# Supplementary material for: Automatic coronary artery segmentation of CCTA images using UNet with a local contextual transformer
Source: Frontiers journal article supplement (doi:10.3389/fphys.2023.1138257), 2023-08-22
Supplement: Data_Sheet_1.PDF [file Data_Sheet_1.PDF]

Supplementary materials: All of the methods that compared against in Table 3.

| Case | GT                                                                                  | 3D-UNet                                                                             | VNet                                                                                 | ResUNet                                                                               | DenseUNet                                                                             | AttUNet                                                                               | UNETR                                                                                 | UCTransNet                                                                            | DR-LCT-UNet (Ours)                                                                    |
|------|-------------------------------------------------------------------------------------|-------------------------------------------------------------------------------------|--------------------------------------------------------------------------------------|---------------------------------------------------------------------------------------|---------------------------------------------------------------------------------------|---------------------------------------------------------------------------------------|---------------------------------------------------------------------------------------|---------------------------------------------------------------------------------------|---------------------------------------------------------------------------------------|
| 1    | 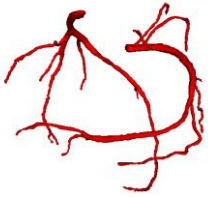   |    |    |    |    |    |    |    |    |
| 2    |    |    |    |    |    |    |    |    |    |
| 3    |  |  |  |  |  |  |  |  |  |
| 4    |  |  |  |  |  |  |  |  |  |
